# Supplementary material for: Adipose most abundant 2 protein is a predictive marker for cisplatin sensitivity in cancers
Source: PubMed Central journal article supplement (PMC7973578; doi:10.1038/s41598-021-85498-7), 2021-03-18

*Supplementary Information*

**Adipose Most Abundant 2 Protein is a Predictive Marker for Cisplatin Sensitivity  
in Cancers**

Kenya Kamimura,<sup>1\*</sup> Takeshi Suda,<sup>2</sup> Yasuo Fukuhara,<sup>1</sup> Shujiro Okuda,<sup>3</sup> Yu Watanabe,<sup>3</sup>  
Takeshi Yokoo,<sup>1</sup> Akihiko Osaki,<sup>4</sup> Nobuo Waguri,<sup>4</sup> Toru Ishikawa,<sup>5</sup> Toshihiro Sato,<sup>6</sup>  
Yutaka Aoyagi,<sup>7</sup> Masaaki Takamura,<sup>1</sup> Toshifumi Wakai,<sup>8</sup> and Shuji Terai<sup>1</sup>

<sup>1</sup>Division of Gastroenterology and Hepatology, Graduate School of Medical and Dental Sciences, Niigata University, Niigata, Niigata, 951-8510, Japan

<sup>2</sup>Department of Gastroenterology and Hepatology, Uonuma Institute of Community Medicine Niigata University Hospital, Minamiuonuma, Niigata, 949-7302, Japan

<sup>3</sup>Division of Bioinformatics, Graduate School of Medical and Dental Sciences, Niigata University, Niigata, Niigata, 951-8510, Japan

<sup>4</sup>Department of Gastroenterology and Hepatology, Niigata City General Hospital, Niigata, Niigata, 950-1197, Japan

<sup>5</sup>Department of Gastroenterology and Hepatology, Saiseikai Niigata Hospital, Niigata, Niigata, 950-1104, Japan

<sup>6</sup>Department of Gastroenterology, Kashiwazaki General Hospital and Medical Center, Kashiwazaki, Niigata 945-8535, Japan

<sup>7</sup>Department of Gastroenterology and Hepatology, Niigata Medical Center, Niigata, Niigata, 950-2022, Japan

<sup>8</sup>Division of Digestive and General Surgery, Graduate School of Medical and Dental Sciences, Niigata University, Niigata, Niigata, 951-8510, Japan

\*Correspondence should be addressed to: Kenya Kamimura, M.D., Ph.D.

Division of Gastroenterology and Hepatology

Graduate School of Medical and Dental Sciences

Niigata University

1-757 Asahimachi-dori

Chuo-ku, Niigata, Niigata, 951-8510

Tel: +81 (25) 227-2207

Fax: +81 (25) 227-0776

E-mail: [kenya-k@med.niigata-u.ac.jp](mailto:kenya-k@med.niigata-u.ac.jp)

**Short running title:** *APM2 is a novel marker for CDDP sensitivity*

Supplementary Figure S1

(a)

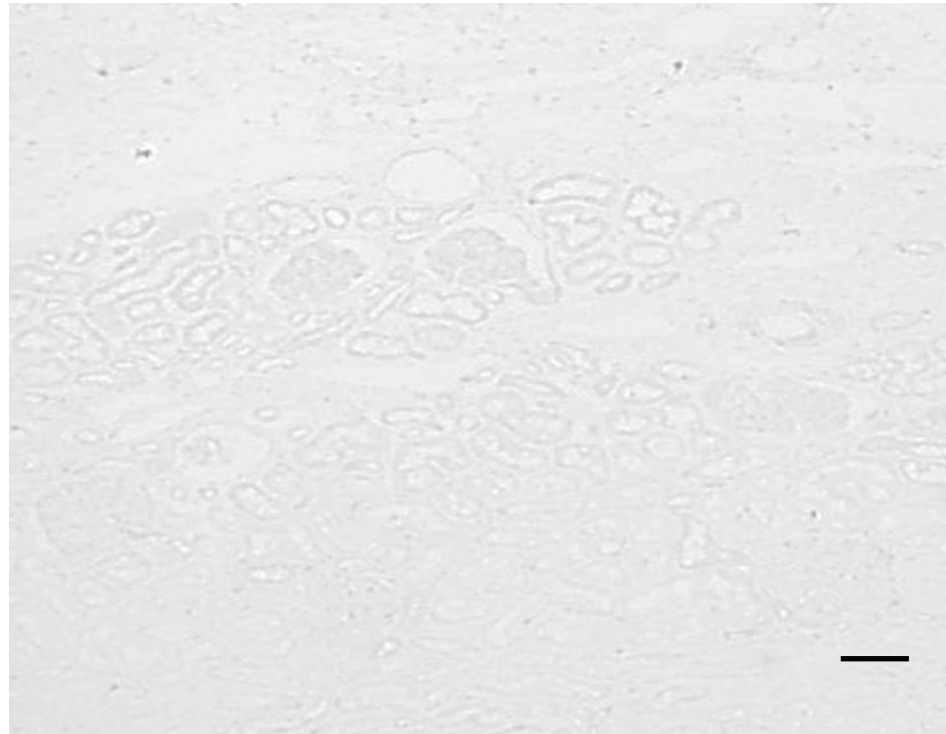

(b)

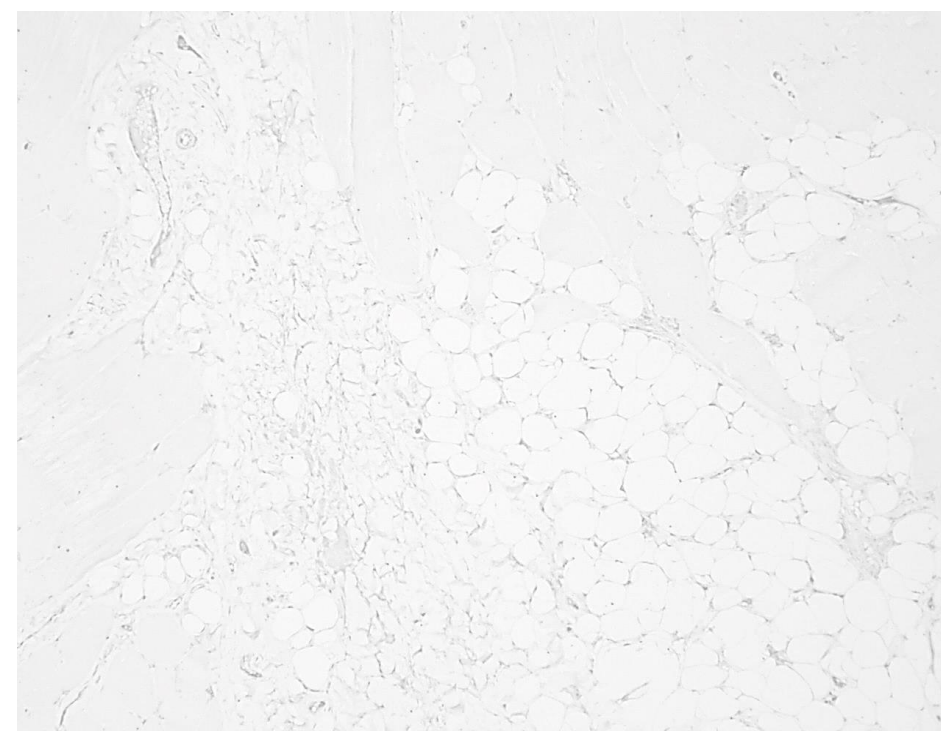

(c)

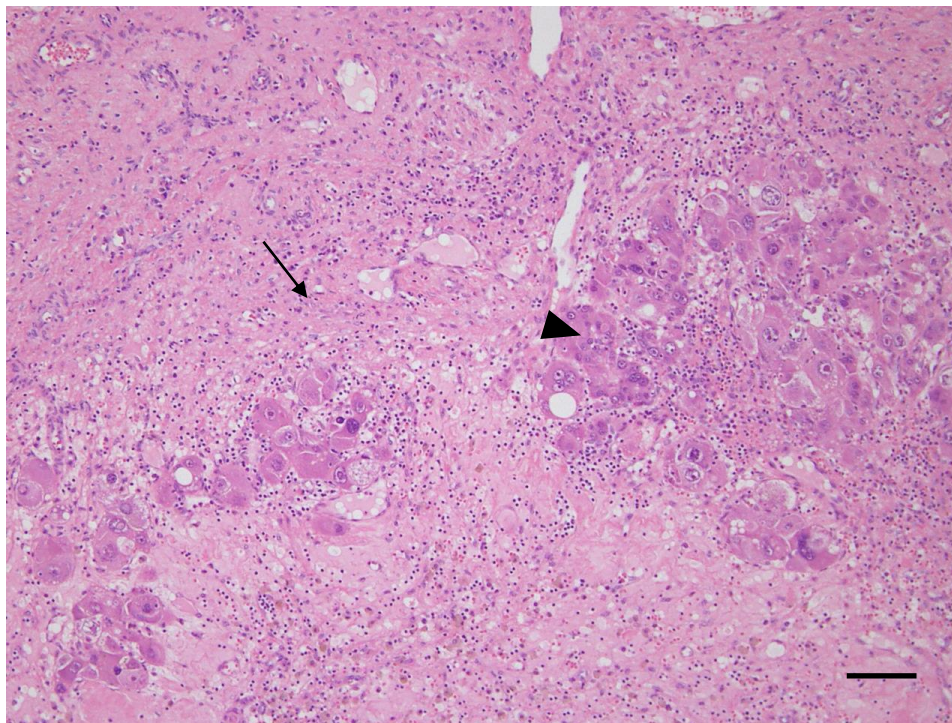

(d)

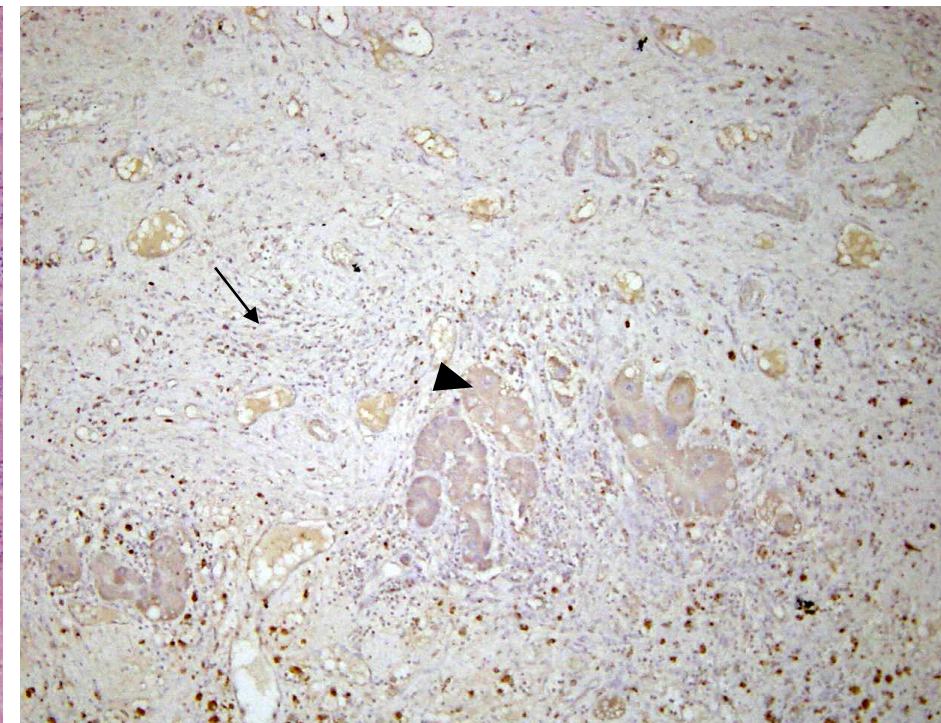

(e)

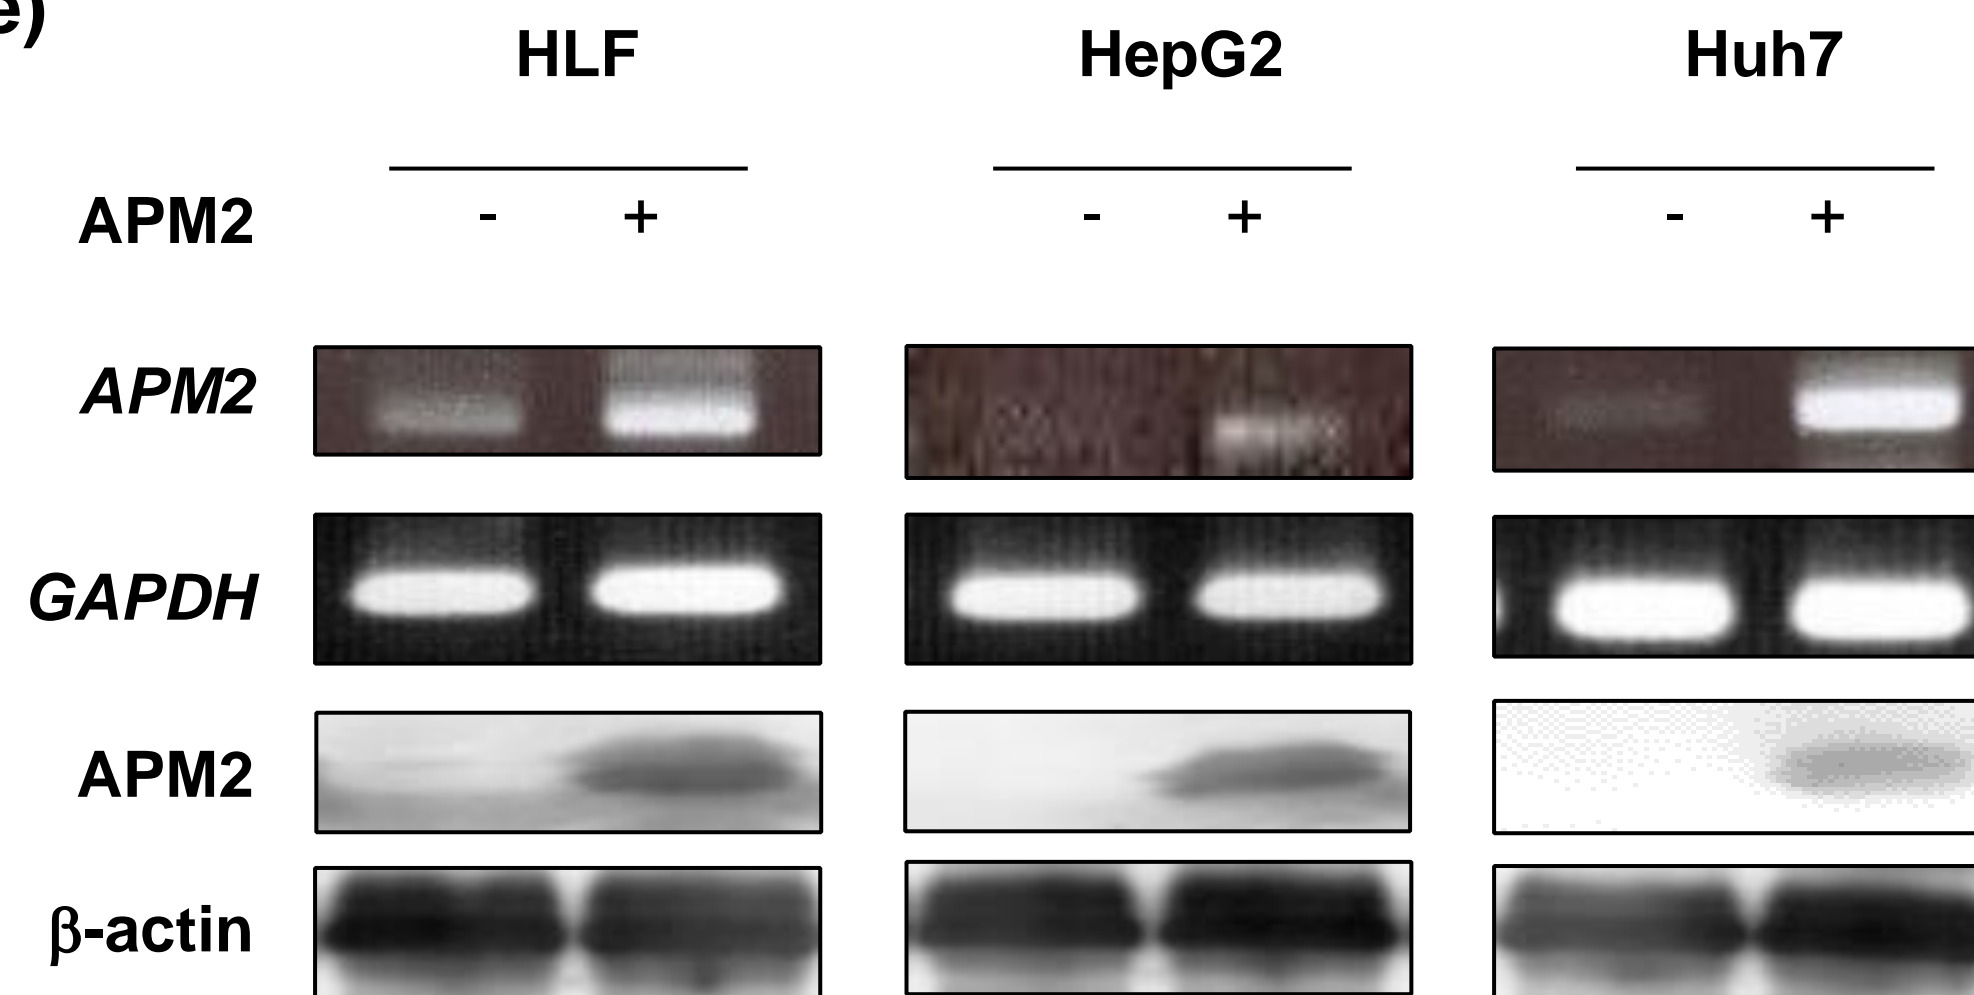

**Supplementary information 1. Gels and Blots for Fig. 2 and Suppl. Fig S1**

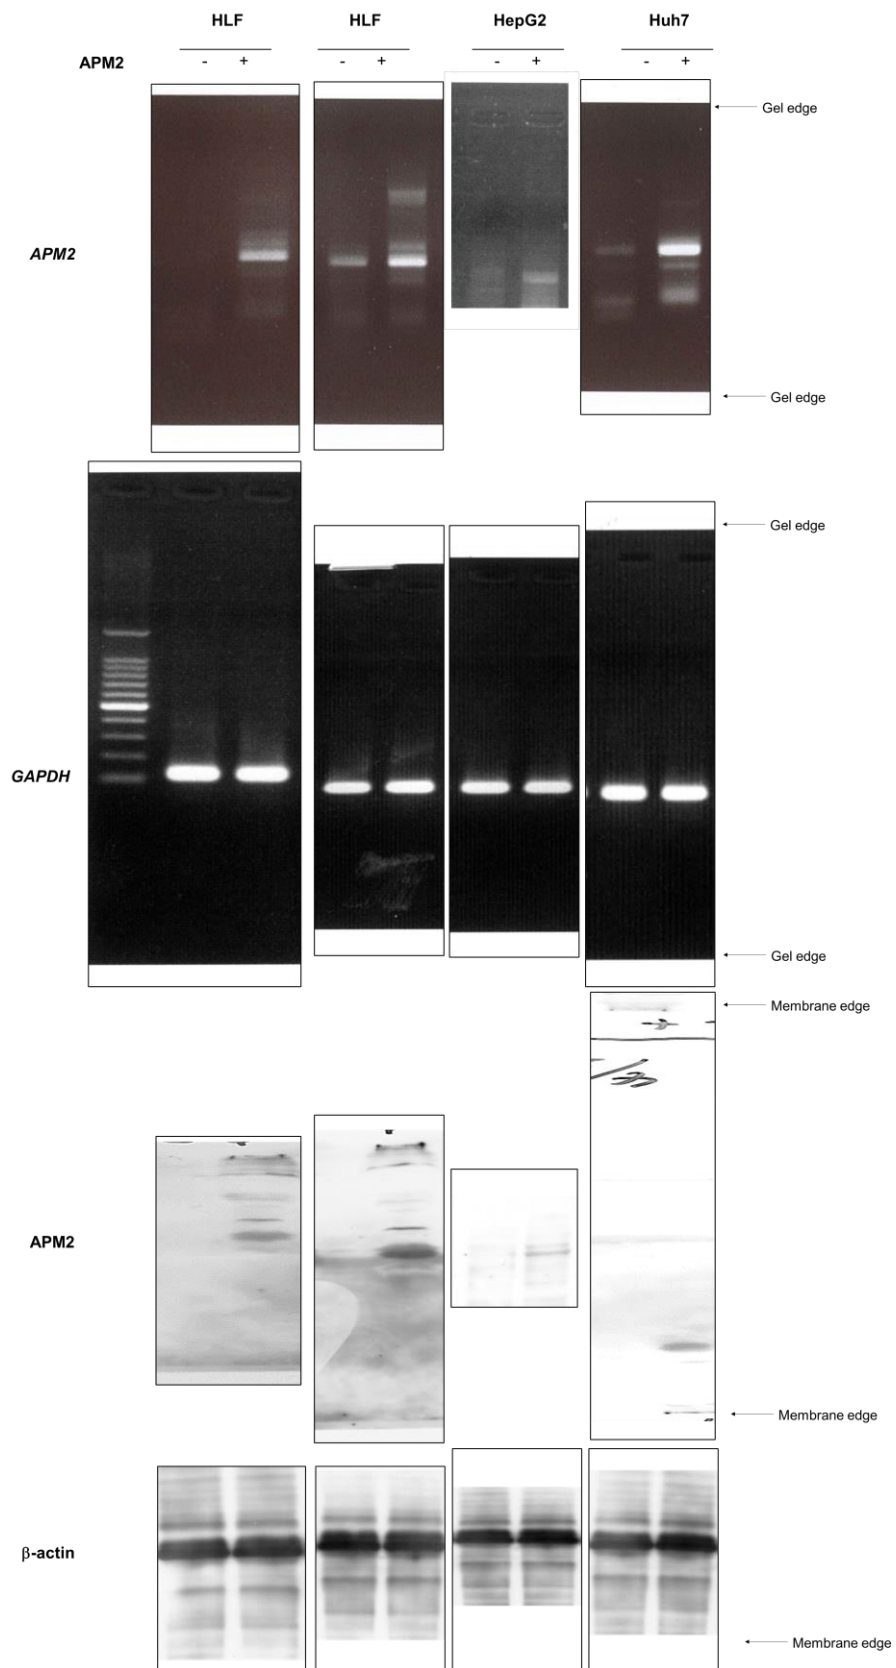

## Supplementary information 2. Gels and Blots for Fig. 4

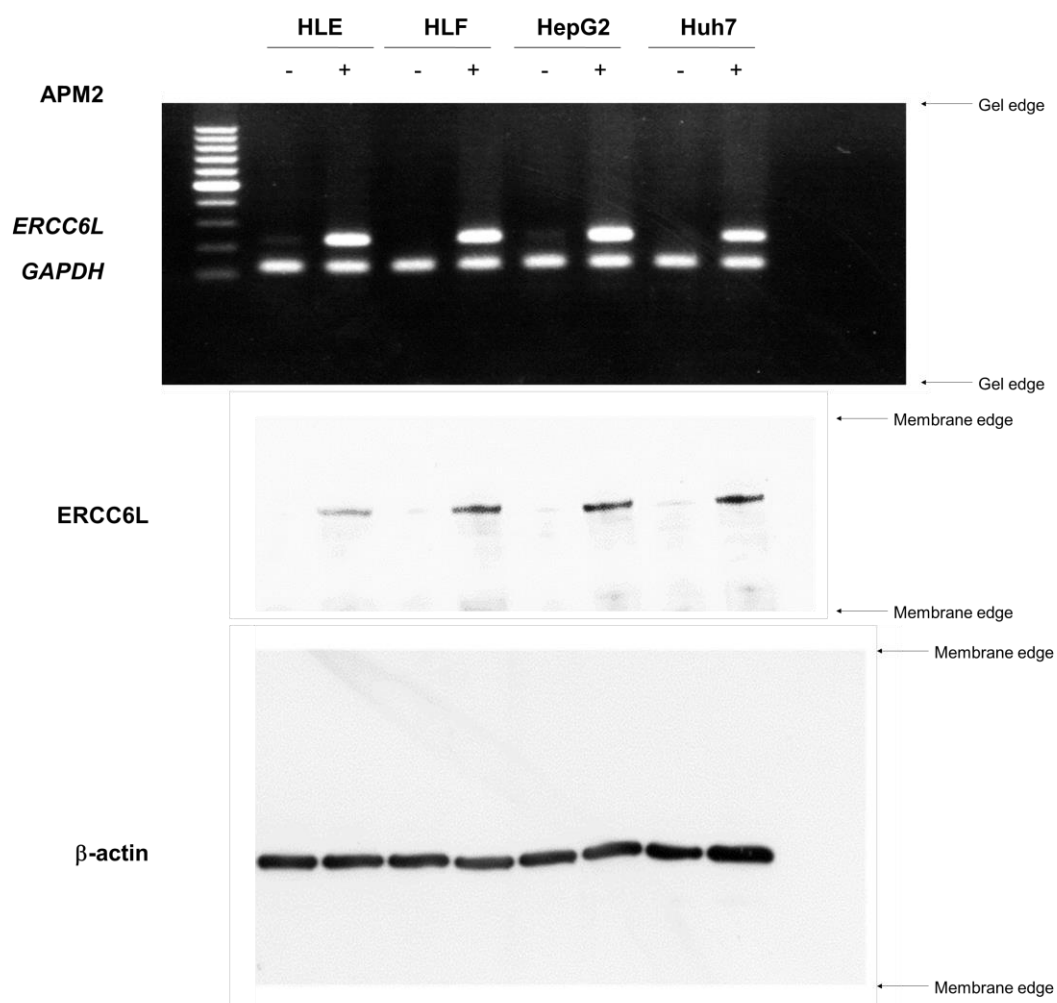

Supplement: 41598_2021_85498_MOESM1_ESM.pdf [file 41598_2021_85498_MOESM1_ESM.pdf]
